# Supplementary material for: SNPs in the interleukin-12 signaling pathway are associated with breast cancer risk in Puerto Rican women
Source: PubMed Central journal article supplement (PMC7500104; doi:10.18632/oncotarget.27707), 2020-09-15
Supplement: oncotarget-11-3420-s001.pdf [file oncotarget-11-3420-s001.pdf]

# SNPs in the interleukin-12 signaling pathway are associated with breast cancer risk in Puerto Rican women

## SUPPLEMENTARY MATERIALS

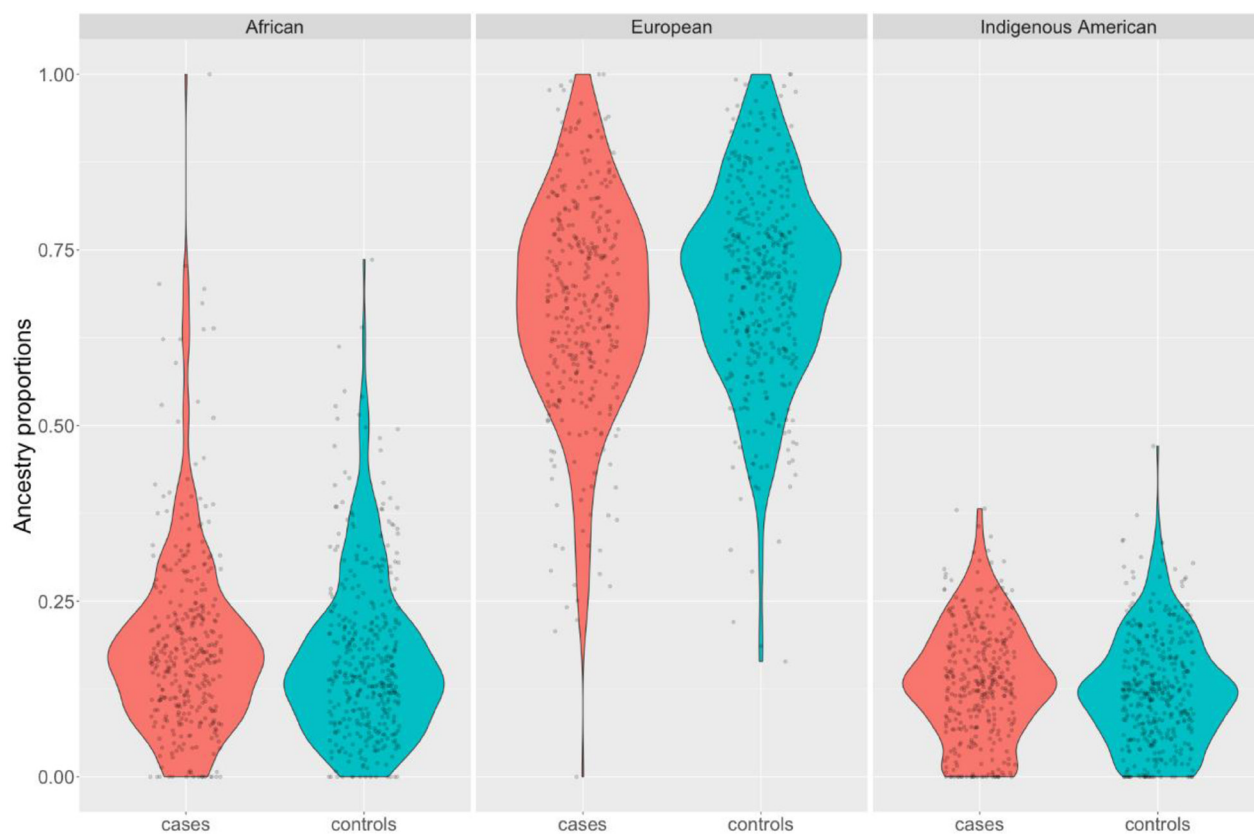

**Supplementary Figure 1: Distribution of the genetic ancestry (European, African and Indigenous American admixture) in the study samples.** The distribution of the genetic ancestry from study cases (pink) and controls (green) is depicted.

**Supplementary Table 1: Tumor characteristics of the study-population**

| <b>Characteristic</b>          | <b>Frequency</b> |
|--------------------------------|------------------|
| <i>Type of carcinoma</i>       | <i>n (%)</i>     |
| Ductal                         | 393 (90.3)       |
| Lobular                        | 30 (6.8)         |
| Ductal + Lobular               | 9 (2.9)          |
| <i>Tumor invasiveness</i>      | <i>n (%)</i>     |
| <i>In situ</i>                 | 89 (20.6)        |
| Invasive                       | 343 (79.4)       |
| <i>Tumor grade</i>             | <i>n (%)</i>     |
| I                              | 66 (17.0)        |
| II                             | 197 (50.6)       |
| II                             | 126 (32.4)       |
| <i>Tumor size</i>              | <i>n (%)</i>     |
| Less than 2 cm                 | 153 (63.2)       |
| More than 2 cm                 | 89 (36.8)        |
| <i>Lymph node invasiveness</i> | <i>n (%)</i>     |
| Yes                            | 68 (37.8)        |
| No                             | 112 (62.2)       |
| <i>Receptor status</i>         | <i>n (%)</i>     |
| Estrogen Positive (ER pos)     | 266 (75.7)       |
| Estrogen Negative (ER neg)     | 85 (24.3)        |
| Progesterone Positive (PR pos) | 230 (66.3)       |
| Progesterone Negative (PR neg) | 117 (33.7)       |
|                                | <i>n (%)</i>     |
| ER pos PR pos/neg              | 229 (74.1)       |
| ER neg PR neg                  | 80 (25.9)        |
| <i>Molecular subtype</i>       | <i>n (%)</i>     |
| Luminal A (LA)                 | 233 (69.8)       |
| Luminal B (LB)                 | 31 (9.2)         |
| HER-2 enriched (HER2 +)        | 25 (7.5)         |
| Basal-like (BL)                | 45 (13.5)        |

ER: Estrogen receptor; PR: Progesterone receptor.

**Supplementary Table 2: Basic information of the IL-12 signaling axis SNPs**

| Gene           | Chromosome location | SNP        | SNP type |
|----------------|---------------------|------------|----------|
| <i>IL12A</i>   | 3q25.33             | rs2243123  | Intronic |
| <i>IL12RB1</i> | 19p13.1             | rs3761041  | Intronic |
|                |                     | rs401502   | Exonic   |
|                |                     | rs404733   | 3' UTR   |
|                |                     | rs438421   | Intronic |
| <i>IL12RB2</i> | 1p31.3              | rs6693065  | Intronic |
| <i>JAK2</i>    | 9p24.1              | rs10974947 | Intronic |
|                |                     | rs2274471  | Intronic |
|                |                     | rs7849191  | Intronic |
| <i>TYK2</i>    | 19p13.2             | rs280500   | 5' UTR   |
| <i>STAT4</i>   | 2q32.3              | rs10168266 | Intronic |
|                |                     | rs4274624  | Intronic |
|                |                     | rs7599504  | Intronic |
|                |                     | rs925847   | Intronic |
| <i>IFNG</i>    | 12q15               | rs2069718  | Intronic |
| <i>TBX21</i>   | 17q21.32            | rs2158079  | Intronic |
| <i>PIAS2</i>   | 18q21.1             | rs10502878 | 3' UTR   |
|                |                     | rs2156049  | Intronic |
|                |                     | rs9304337  | Intronic |

p: chromosome small arm; q: chromosome large arm; UTR: Untranslated region.

**Supplementary Table 3: Association of the IL-12 signaling SNPs and BC risk in Puerto Rican women by crude logistic regression analysis. See Supplementary Table 3**

**Supplementary Table 4: Association of IL-12 signaling SNPs with BC risk in Puerto Rican women by logistic regression. See Supplementary Table 4**
